# Supplementary material for: Multielemental Stoichiometry in Plant Organs: A Case Study With the Alpine Herb Gentiana rigescens Across Southwest China
Source: PubMed Central journal article supplement (PMC7198822; doi:10.3389/fpls.2020.00441), 2020-04-28
Supplement: Presentation_1.pdf [file Presentation_1.pdf]

## *Supplementary Material*

**Table S1. Information of the sampling sites.**

| <b>Population code</b> | <b>Elevation</b> | <b>Latitude</b> | <b>Longitude</b> | <b>Site</b>     |
|------------------------|------------------|-----------------|------------------|-----------------|
| 1                      | 2978             | N26°34'36.6"    | E99°26'32.5"     | Nujiang, Yunnan |
| 2                      | 2356             | N25°29'33.7"    | E99°38'17.5"     | Dali, Yunnan    |
| 3                      | 2852             | N25°51'14.1"    | E99°51'20.4"     | Nujiang, Yunnan |
| 4                      | 2821             | N24°48'39.5"    | E99°47'10.2"     | Baoshan, Yunnan |
| 5                      | 1914             | N24°57'01.1"    | E100°28'10.7"    | Dali, Yunnan    |
| 6                      | 2520             | N24°29'40.2"    | E100°47'05.8"    | Pu'er, Yunnan   |
| 7                      | 2311             | N23°55'25.5"    | E101°06'14.3"    | Pu'er, Yunnan   |
| 8                      | 2302             | N23°56'21.0"    | E101°29'05.6"    | Yuxi, Yunnan    |
| 9                      | 2016             | N23°58'01.1"    | E101°56'57.1"    | Yuxi, Yunnan    |
| 10                     | 1817             | N25°02'57.7"    | E103°17'39.6"    | Kunming, Yunnan |
| 11                     | 2144             | N24°42'47.6"    | E103°36'19.5"    | Kunming, Yunnan |
| 12                     | 2072             | N25°42'22.1"    | E104°10'27.5"    | Qujing, Yunnan  |
| 13                     | 2292             | N25°19'62.57"   | E102°52'38.01"   | Kunming, Yunnan |
| 14                     | 1879             | N24°23'31.34"   | E102°40'37.45"   | Yuxi, Yunnan    |
| 15                     | 2318             | N24°30'53.9"    | E103°49'42.2"    | Honghe, Yunnan  |
| 16                     | 1891             | N24°24'51.4"    | E103°41'16.3"    | Honghe, Yunnan  |
| 17                     | 2015             | N24°15'16.1"    | E103°37'26.0"    | Honghe, Yunnan  |
| 18                     | 1993             | N24°02'38.8"    | E103°44'26.3"    | Wenshan, Yunnan |
| 19                     | 1788             | N23°18'58.7"    | E104°08'32.3"    | Wenshan, Yunnan |
| 20                     | 1987             | N23°24'27.4"    | E103°43'50.2"    | Honghe, Yunnan  |

---

|    |      |              |               |                      |
|----|------|--------------|---------------|----------------------|
| 21 | 1945 | N23°46'43.2" | E102°48'49.4" | Honghe, Yunnan       |
| 22 | 2205 | N25°23'24.3" | E102°26'47.0" | Kunming, Yunnan      |
| 23 | 1804 | N25°40'06.3" | E101°36'44.4" | Chuxiong, Yunnan     |
| 24 | 1969 | N25°05'05.4" | E101°16'51.9" | Chuxiong, Yunnan     |
| 25 | 1945 | N24°08'19.4" | E102°15'26.1" | Yuxi, Yunnan         |
| 26 | 2061 | N25°27'30.0" | E103°36'21.4" | Qujing, Yunnan       |
| 27 | 2258 | N27°42'36.8" | E102°21'30.4" | Liangshan, Sichuan   |
| 28 | 2601 | N27°51'03.5" | E102°25'50.3" | Liangshan, Sichuan   |
| 29 | 1921 | N28°31'27.2" | E102°12'19.3" | Liangshan, Sichuan   |
| 30 | 2807 | N27°09'35.0" | E101°16'26.5" | Panzhuhua, Sichuan   |
| 31 | 1663 | N27°11'51.3" | E105°42'23.0" | Bijie, Guizhou       |
| 32 | 1454 | N26°56'00.0" | E105°55'54.0" | Bijie, Guizhou       |
| 33 | 1895 | N26°43'06.1" | E105°16'40.5" | Bijie, Guizhou       |
| 34 | 2473 | N26°38'29.4" | E104°42'37.5" | Liupanshui, Guizhou  |
| 35 | 1990 | N27°04'59.9" | E104°38'05.0" | Bijie, Guizhou       |
| 36 | 2018 | N27°18'21.2" | E104°45'57.3" | Bijie, Guizhou       |
| 37 | 1590 | N26°38'22.6" | E104°43'26.0" | Guiyang, Guizhou     |
| 38 | 1598 | N25°07'00.7" | E104°43'38.2" | Qianxinan, Guizhou   |
| 39 | 1800 | N25°22'58.0" | E105°07'19.5" | Qianxinan, Guizhou   |
| 40 | 1393 | N26°33'33.6" | E106°54'59.2" | Qiannan, Guizhou     |
| 41 | 1300 | N26°27'38.7" | E106°55'40.8" | Qiannan, Guizhou     |
| 42 | 1231 | N26°23'58.7" | E107°58'18.3" | Qiandongnan, Guizhou |
| 43 | 1577 | N26°22'43.7" | E108°11'08.0" | Qiandongnan, Guizhou |
| 44 | 1260 | N26°33'36.2" | E108°19'45.5" | Qiandongnan, Guizhou |
| 45 | 2036 | N24°58'11"   | E104°45'46"   | Xingyi, Guizhou      |

---

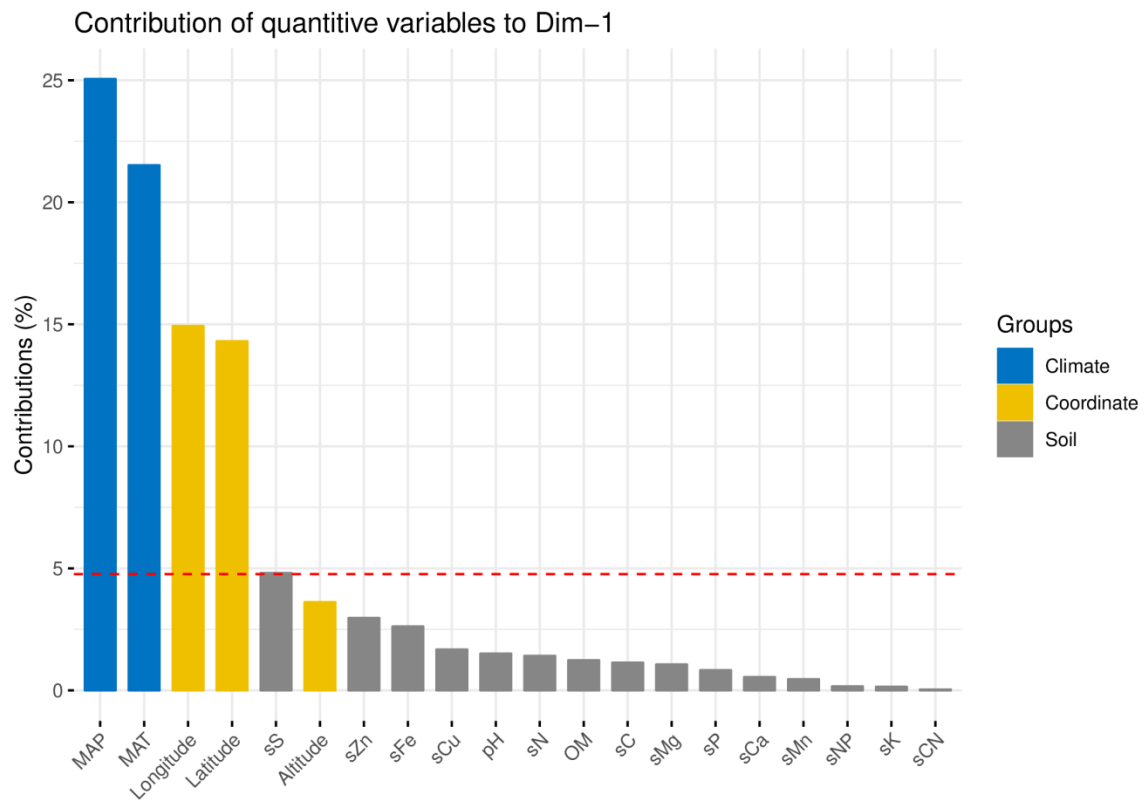

**Figure S1. The contribution of quantitative variables (in %) to the first dimension of the multiple factor analysis.**

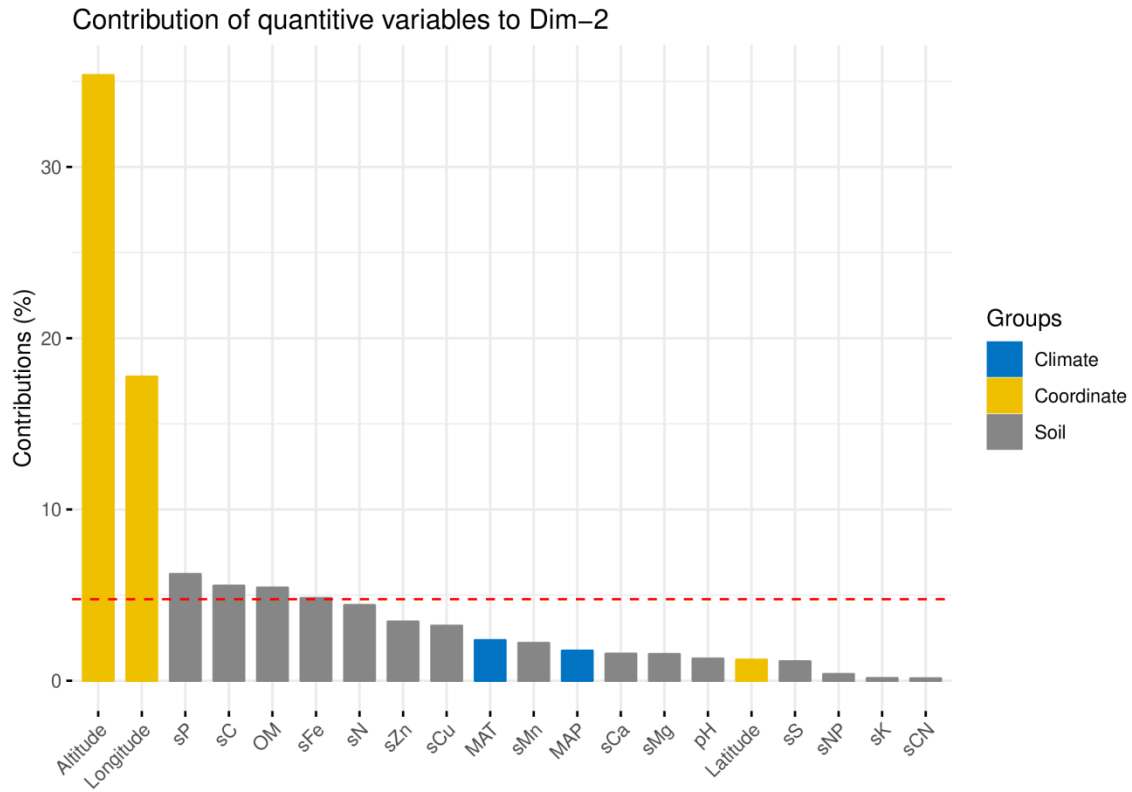

**Figure S2. The contribution of quantitative variables (in %) to the second dimension of the multiple factor analysis.**
